# Supplementary material for: Surface-adhesive and osteogenic self-assembled peptide nanofibers for bioinspired functionalization of titanium surfaces
Source: Royal Society of Chemistry journal article supplement (doi:10.1039/c2sm25127b), 2012-01-01
Supplement: c2sm25127b.pdf [file c2sm25127b.pdf]

## Supporting Information for

# Surface-Adhesive and Osteogenic Self-Assembled Peptide Nanofibers for Bioinspired Functionalization of Titanium Surfaces

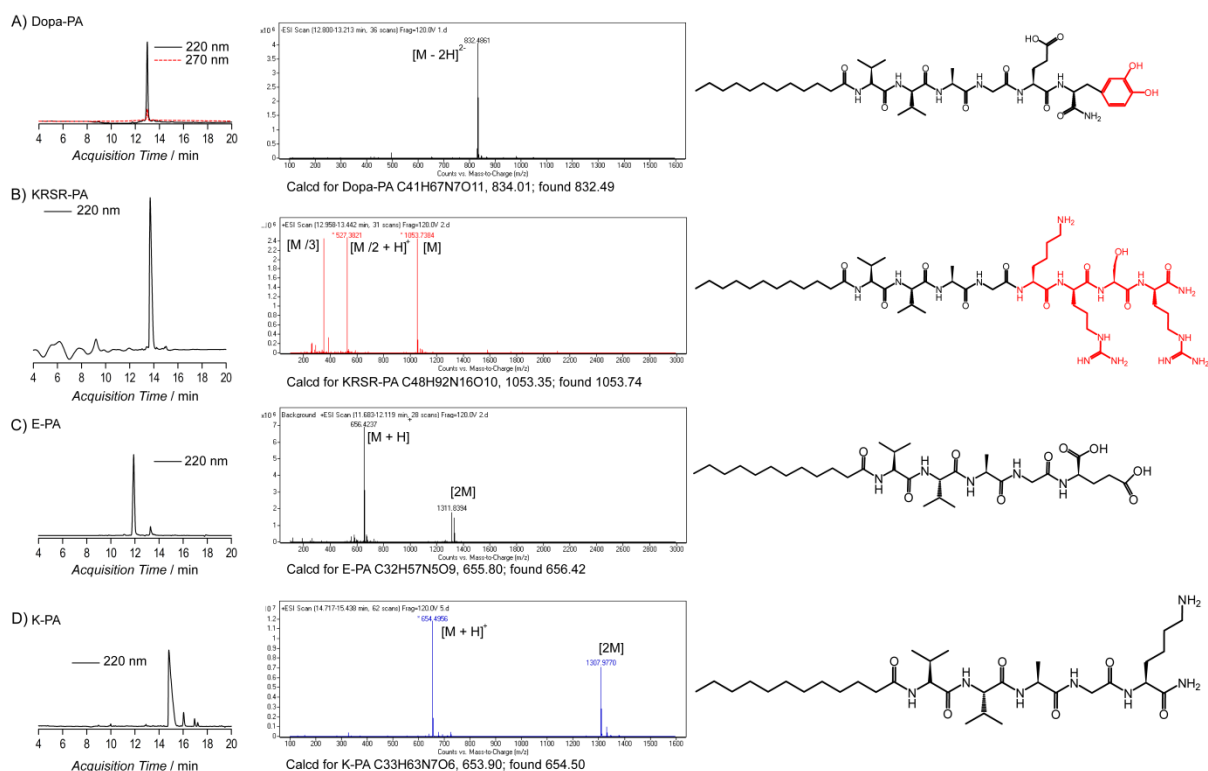

**Figure S1.** All PA batches were synthesized and used with more than 90% purity. Purity levels were assessed according to amide content. Each synthesis was characterized with analytical HPLC equipped with mass spectrometer for Dopa-PA, KRSR-PA, E-PA and K-PA, respectively. E-PA was synthesized as a control PA molecule for Dopa-PA and K-PA was synthesized as a control molecule for KRSR-PA. All PA molecules were designed by utilizing similar principles. The aliphatic hydrophobic tail, lauric acid, drives the hydrophobic collapse and hence was attached adjacent to the  $\beta$ -sheet-driving hydrophobic amino acids, which are located in the order of Val-Val-Ala-Gly, from C to N terminal. These amino acids were incorporated in the order of increasing hydrophilicity as the design requires. The self-assembly mechanism and the spatial arrangement of the ligands on the fibers enabled presentation of more than one functional unit at the same time.

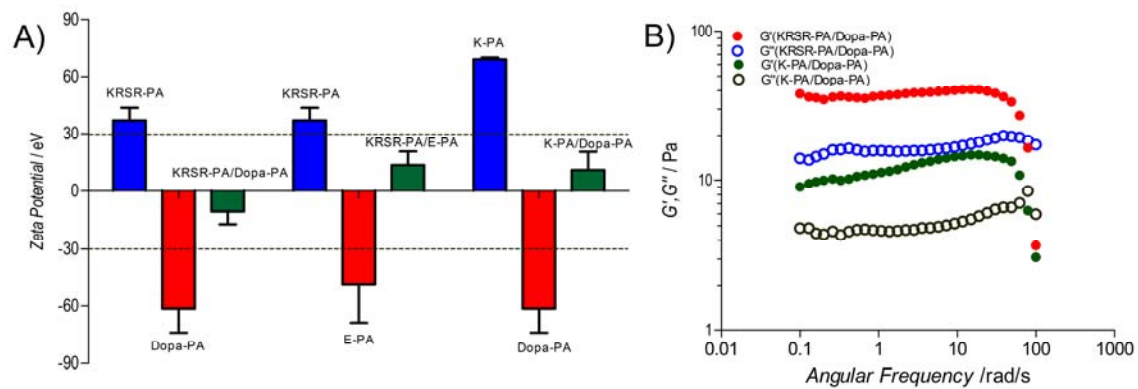

**Figure S2.** A) Zeta-potential measurements of individual PAs and their mixture as used in the article. B) Rheology measurements of PAs used in in vitro experiments to show the formation of a network that has soft mechanical properties, which mimicked native ECM.

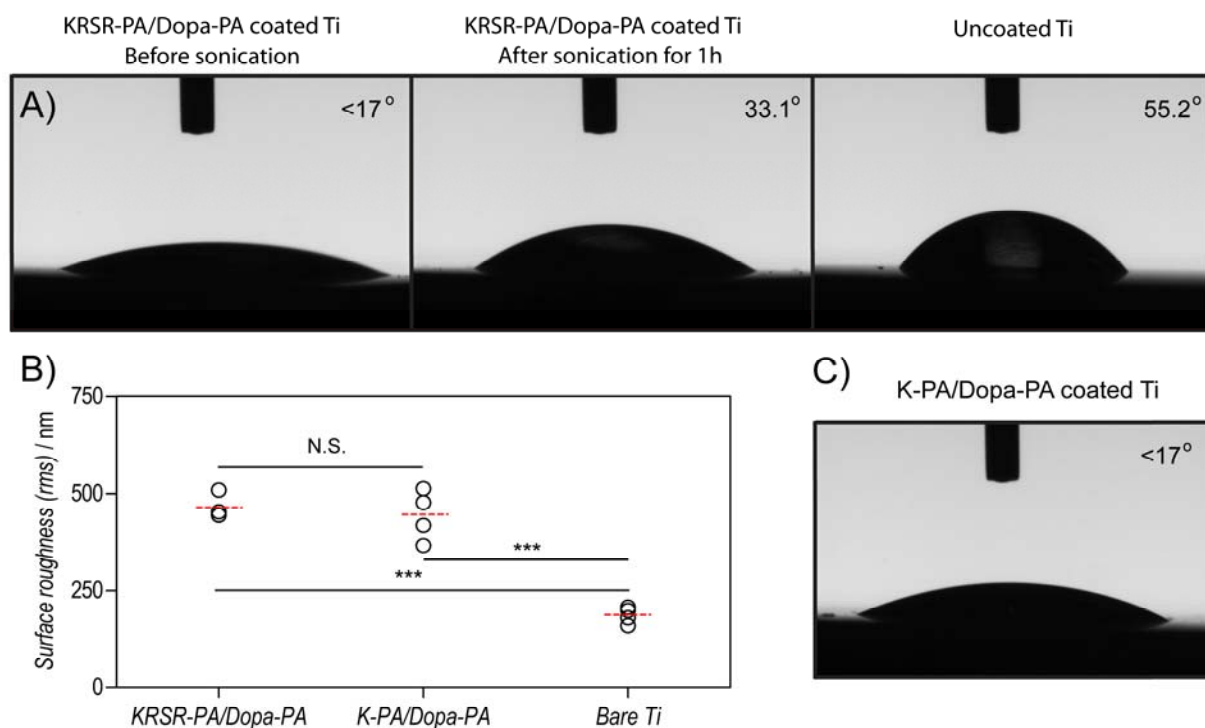

**Figure S3.** A) Contact angles of titanium substrates as bare, KRSR-PA/Dopa-PA coated and after 1 h sonication following KRSR-PA/Dopa-PA coating. B) Surface roughness (in terms of root mean square, or rms) of PA nanofibers and bare titanium surface used in in vitro experiments. C) Contact angle of K-PA/Dopa-PA coated titanium surface. \*\*\* $p < 0.0001$ , N.S., no significance.

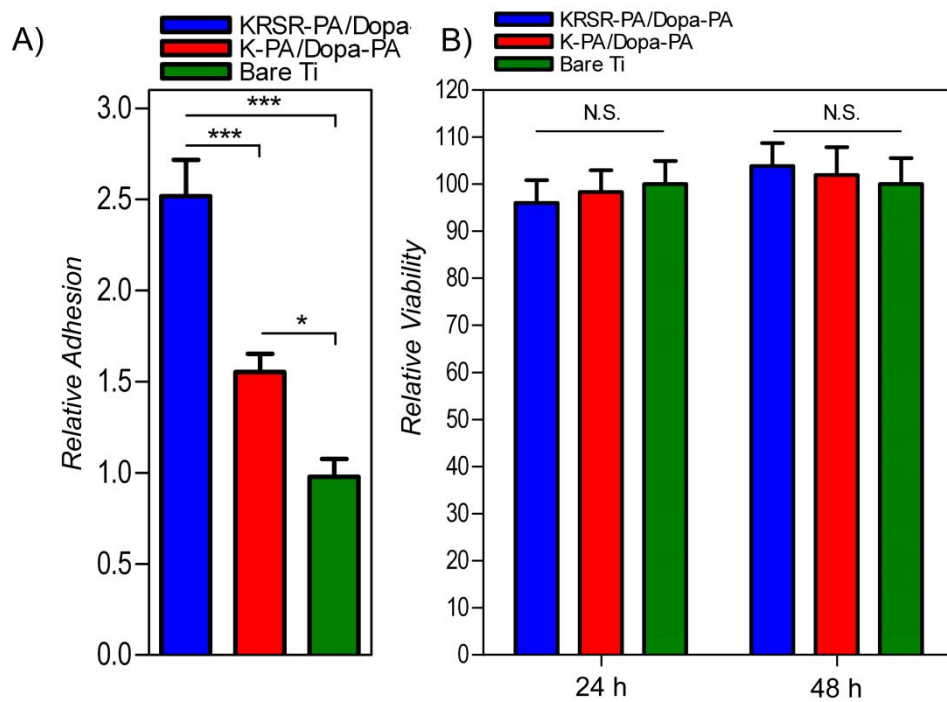

**Figure S4.** Adhesion (A) and viability (B) of MC3T3-E1 cells on functionalized titanium surfaces. \* $p < 0.05$ , \*\*\* $p < 0.0001$ , N.S., no significance.

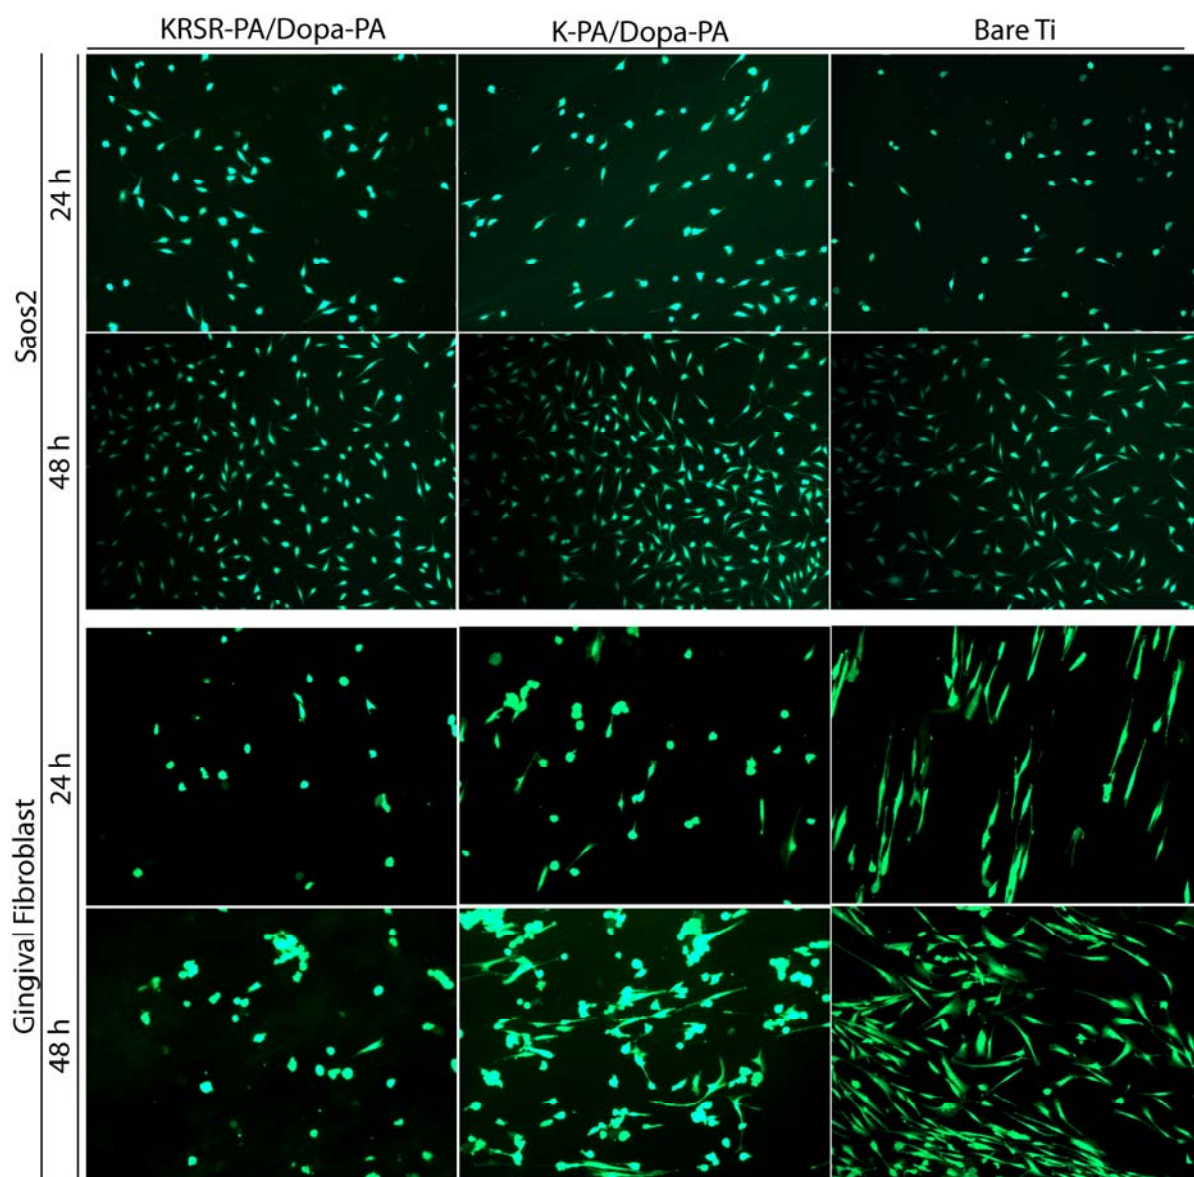

**Figure S5.** Representative Calcein-AM stained micrographs (10X) of Saos2 and HGF cells at 24 and 48 h on PA coated and bare titanium surfaces.

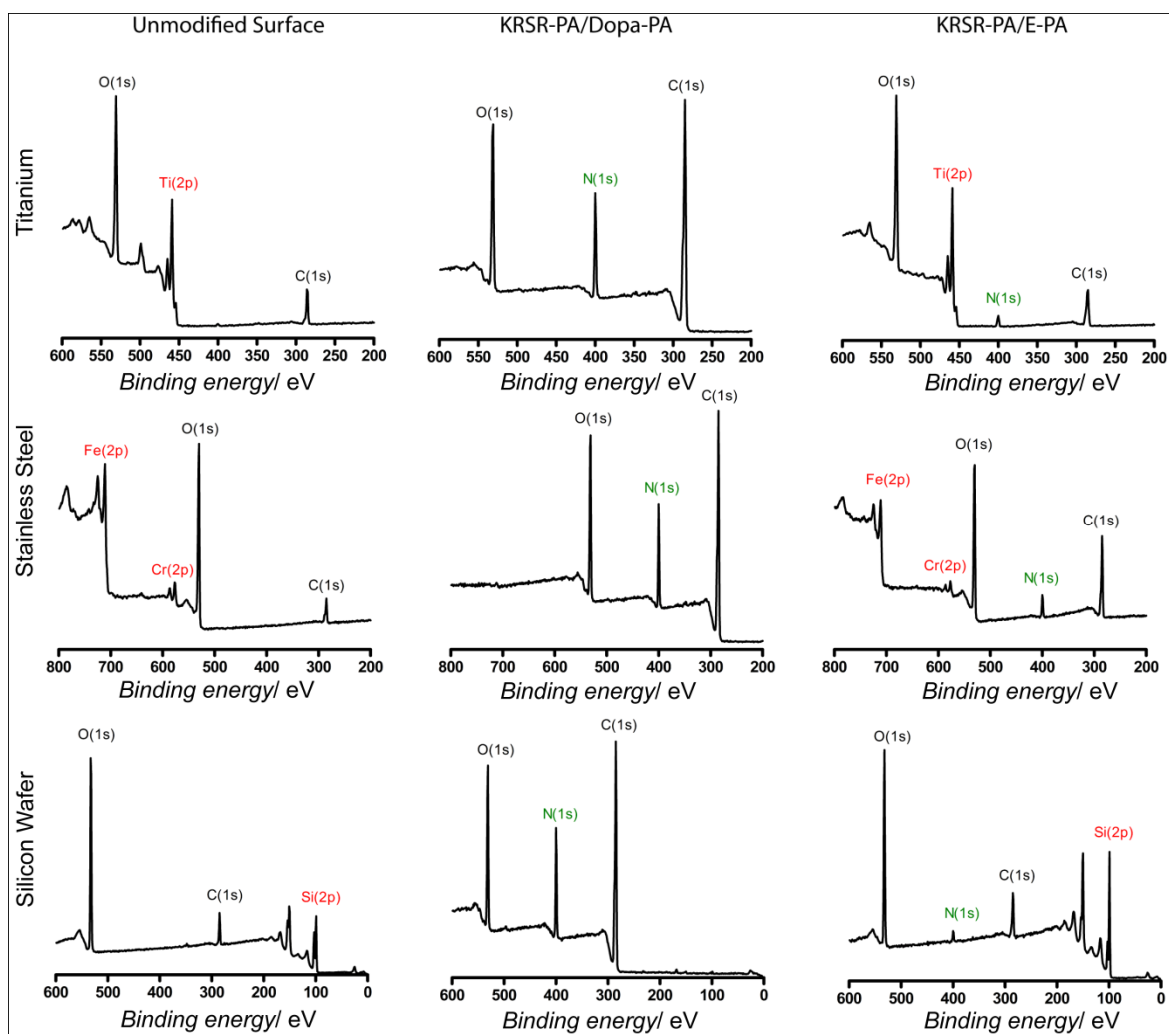

**Figure S6.** XPS spectra of functionalized titanium, stainless steel, and silicon surfaces with KRSR-PA/Dopa-PA nanofibers.

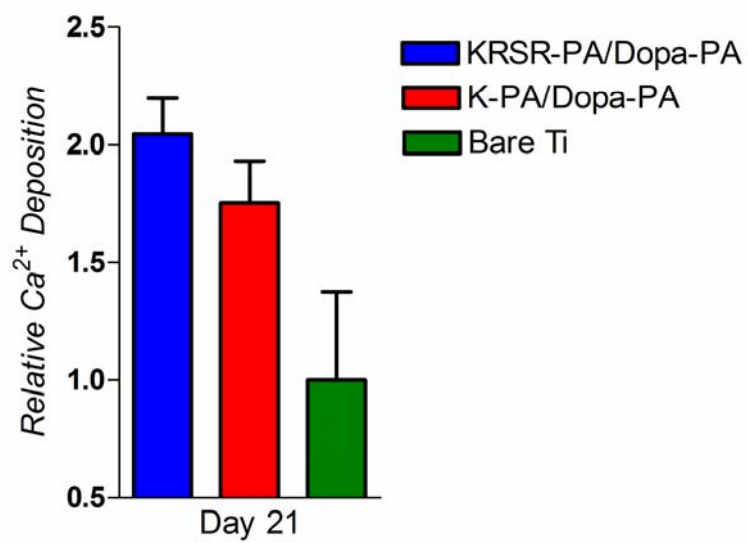

**Figure S7.** Quantification of relative calcium deposition on the matrix on day 21.

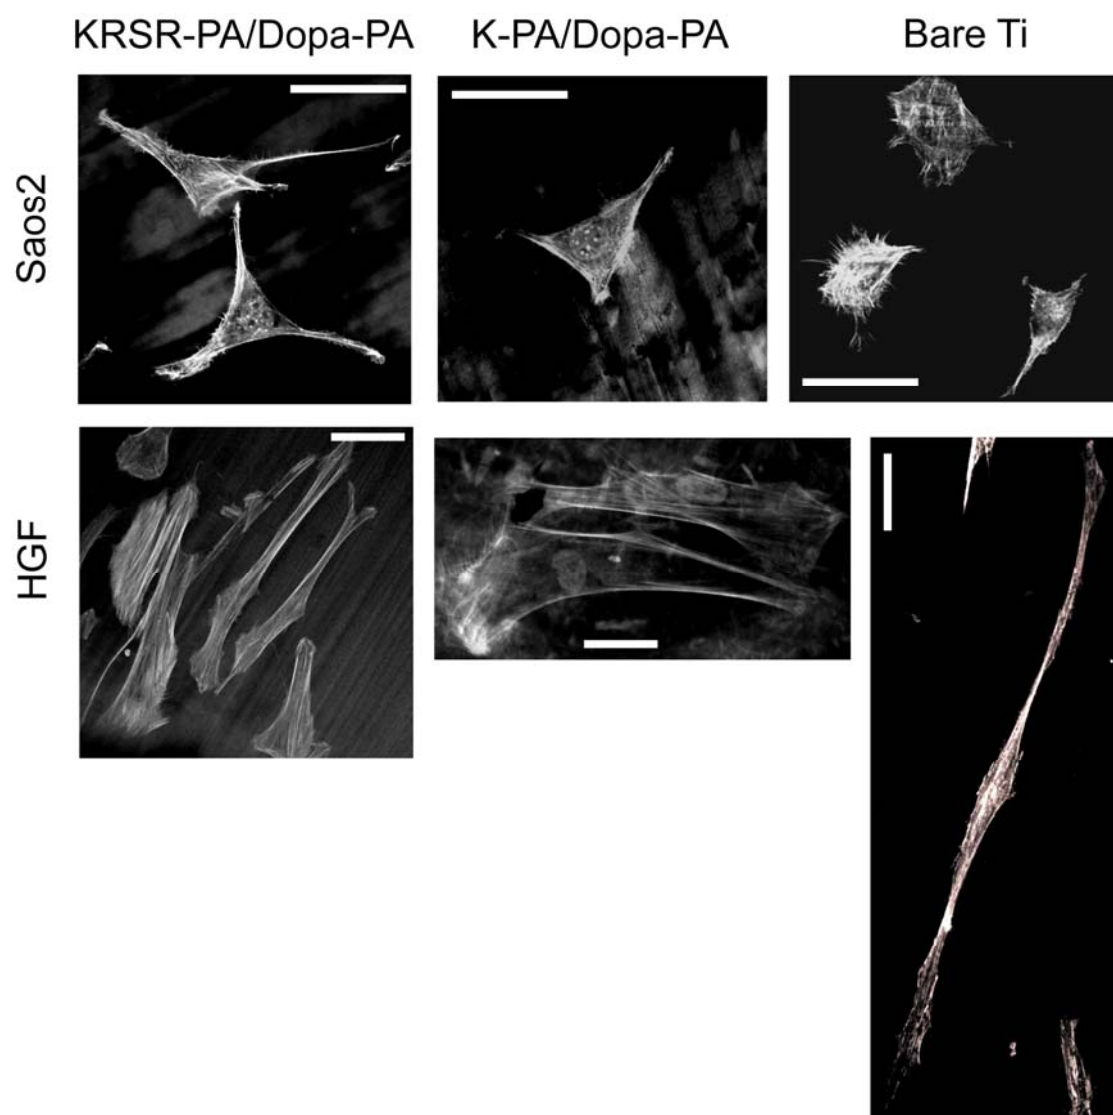

**Figure S8.** Representative high magnification confocal images of the cells at 24 h. Actin microfilaments and nuclei of cells were stained with TRITC-phalloidin and TO-PRO®, respectively. Scale bars show 50 μm.



### Assignment of FT-IR spectra peaks on KRSR-PA/Dopa-PA coated titanium surface

(Figure 3D in the Manuscript)

FT-IR spectra in the range of 1100 and 1700  $\text{cm}^{-1}$  for PA nanofibers adsorbed on stainless steel surface provided information to characterize the presence of Dopa on adsorbed PA nanofibers. In peptide structures, amide I is the most intense absorption band, which is characterized by absorption in the range of 1600-1700  $\text{cm}^{-1}$ . Absorption at this range is governed by the stretching vibrations of the carbonyl (C=O) and amide (C-N) groups. The exact localization of the band centre is related to the secondary order of the structure. In our experiment, the amide I band was found to be centered to 1639  $\text{cm}^{-1}$ . Absorption at this wave number had been previously reported to indicate  $\beta$ -sheet-rich secondary order. This observation is consistent with the self-assembly-driven nanofiber formation by means of  $\beta$ -sheets between adjacent micelles and with the results of circular dichroism measurements. Amide II is characterized by absorption in the range of 1490 to 1600  $\text{cm}^{-1}$ ; 1540  $\text{cm}^{-1}$  in our construct. It mainly derives from N-H bending and C-N stretching vibrations. The difference in position of the amide II band is believed to result from differences in experimental conditions. Absorption around the band centered at 1455  $\text{cm}^{-1}$  is expected for the vibration of substituted aromatics. In previous studies, similar bands were characterized for adsorbed *mefp-1* protein in this region and were attributed to the presence of Dopa. The band centered at 1382  $\text{cm}^{-1}$  is due to the alkane -C-H bending that is found in peptide backbone. The band that is centered at 1236  $\text{cm}^{-1}$  was previously associated with C-O stretching vibrations of the catecholic side chains of Dopa. The broad band spanning 960 and 1120  $\text{cm}^{-1}$  is reported to arise from the carboxylic and phenol residues due to the presence of glutamic acid and Dopa.
